# Supplementary material
Source: PubMed Central journal article supplement (PMC3895941)
Supplement: NIHMS363158-supplement-Supplemental_Document.pdf [file NIHMS363158-supplement-Supplemental_Document.pdf]

# NPF Hospitalization Survey

## 1. Center Information

### 1. Please enter your Center's contact information

|                  |                      |
|------------------|----------------------|
| Center name:     | <input type="text"/> |
| Address :        | <input type="text"/> |
| City/town:       | <input type="text"/> |
| State/province:  | <input type="text"/> |
| ZIP/postal code: | <input type="text"/> |
| Country:         | <input type="text"/> |
| Phone number:    | <input type="text"/> |

### \* 2. Please enter your information (person filling out the form)

|                                            |                      |
|--------------------------------------------|----------------------|
| Name                                       | <input type="text"/> |
| Title and credentials(e.g., MD,PA, RN,etc) | <input type="text"/> |
| E-mail address                             | <input type="text"/> |
| Phone Number                               | <input type="text"/> |

### 3. Approximately how many PD patients are followed at your center?

### 4. Of these patients, what percentage would you estimate get admitted to the hospital each year (excluding routine DBS implantations and battery replacements)?

- 0-5%
- 5-10%
- 10-20%
- More than 20%

## 2. Hospitalization Policy

**1. When one of your center's PD patients requires hospitalization, where do you most often admit them?**

My center's hospital

Another hospital

**2. When do you usually learn about a patient's admission?**

Before the admission

At the time of the admission

During the hospitalization

After discharge / follow up visit

**3. How do you usually learn about a patient's hospitalization?(Please choose all that apply)**

Phone call from another physician

Phone call from the patient/caregiver

Automatic notification from an electronic system(electronic medical record)

I don't learn about the hospitalization until the patient shows up in my clinic for follow up

Other (please specify)

**4. Do you instruct patients who present to an emergency room to have the emergency room staff contact your PD clinic?**

Yes

No

**5. If a patient gets admitted to a hospital is there a mechanism/process in place that will trigger a call from the hospital physician to your center?**

Yes

No

## NPF Hospitalization Survey

**6. Does your center have a policy or procedure that patients follow if admitted to a hospital within your hospital system (any hospital that you may have privileges to attend to patients within)?**

Yes

No

**7. Does your center have a policy or procedure that patients follow if admitted to a hospital OUTSIDE your hospital system?**

Yes

No

**8. Is your center using the "NPF Article on Hospitalization of the PD patient"?**

Yes

I don't know what the "NPF article on Hospitalization of the PD patient" is

No

**9. If yes to question 8:**

**The Article contains a checklist that the patient and/or caregiver should hand to practitioners when hospitalized. Have you been providing the checklist to your patients?**

Yes

No

**10. If yes to question 8:**

**Are you aware if patients and/or caregivers are using the checklist?**

Yes, they are using the checklist

No, they are not using the checklist

Unsure

**11. If you are not using the "NPF Article on Hospitalization of the PD patient", does your center have a handout or worksheet that is provided to patients/caregivers that instructs them as to what they should do if hospitalized?**

Yes

No

## NPF Hospitalization Survey

**12. Over the past year how often an anesthesiologist has approached you prior to the operation in order to discuss anesthesia issues?**

Never

Rarely

Often

As a policy in all cases

**13. Does your clinic perform a pre- and post-operatively cognitive screening prior to hospital admission for elective surgeries (e.g. hip, knee, back, etc.)?**

Yes

No

# NPF Hospitalization Survey

## 3. Information on Hospitalization

(where estimates are requested, specify if these are guesses or based on some data, even if incomplete)

### 1. Please evaluate the following reasons for admission in terms of the frequency with which they are seen in your practice:

|                                                                           | Common | Uncommon | Rare |
|---------------------------------------------------------------------------|--------|----------|------|
| Aspiration pneumonia or other lung problem (bronchitis; other pneumonias) | jñ     | jñ       | jñ   |
| Other infections besides pneumonia (UTI, etc.)                            | jñ     | jñ       | jñ   |
| Medication issues (other than DUODOPA)                                    | jñ     | jñ       | jñ   |
| Delirium/mental status change                                             | jñ     | jñ       | jñ   |
| Anxiety, depression or psychosis with a clear sensorium                   | jñ     | jñ       | jñ   |
| Fall/fracture                                                             | jñ     | jñ       | jñ   |
| DBS complication                                                          | jñ     | jñ       | jñ   |
| DUODOPA initiation or related complications                               | jñ     | jñ       | jñ   |
| Elective Surgery                                                          | jñ     | jñ       | jñ   |
| Other                                                                     | jñ     | jñ       | jñ   |

## 4. Involvement of the Experts from Your Center and Follow-up

### 1. In the majority of PD cases admitted to the hospital from your practice, are your center's neurologists or nurse practitioners

- Directly and physically involved
- Involved by phone only
- Not usually involved
- Become involved during clinic follow-ups

Other (please specify)

### 2. How soon can patients be seen after hospital discharge for follow-up in your PD clinic?

- Within 1 week
- Within 2 weeks
- Within 4 weeks
- Greater than 4 weeks

### 3. Who is responsible for setting up post-hospitalization follow-up?

- The outside admitting team
- Your PD clinic

Other (please specify)

# NPF Hospitalization Survey

## 5. Management When in the Hospital

The following set of questions refer to both outside and inside your hospital system

**1. In your experience, what percentage of inpatient PD consultations have you done where a non-selective dopamine blocker was utilized during the hospitalization?**

0-5%

10-20%

5-10%

>20%

**2. In your experience in evaluating PD patients post-hospitalization (from both outside and inside your hospital system) how often do you encounter records indicating a non-selective dopamine blocker was utilized during the hospitalization or given to the patient upon discharge?**

0-5%

10-20%

5-10%

>20%

**3. How confident are you that general physicians caring for PD patients in the hospital are aware of how infections such as UTI's can cloud mental status?**

Very confident

Confident

Not confident

**4. How confident are you that general physicians caring for PD patients in the hospital are aware that dopamine agonists, amantadine, and anticholinergics can cloud mental status?**

Very confident

Confident

Not confident

## NPF Hospitalization Survey

**5. How confident are you that general physicians caring for PD patients in the hospital are aware that reducing dopaminergic medications may improve hallucinations and behavioral issues?**

Very confident

Confident

Not confident

**6. How confident are you that general physicians caring for PD patients in the hospital are aware that metoclopramide and prochlorperazine make PD symptoms worse?**

Very confident

Confident

Not confident

**7. How confident are you that general physicians caring for PD patients in the hospital are aware that quetiapine and clozapine are the safest antipsychotics in PD?**

Very confident

Confident

Not confident

**8. How confident are you that PD patients get their medications on time?**

Very confident

Confident

Not confident

**9. How often are generics substituted for PD medications in the hospital?**

Always substituted

Sometimes substituted

Never Substituted



## NPF Hospitalization Survey

**10. How often are dosing intervals changed from precise times to TID and QID regimens for the convenience of the hospital staff?**

- Frequently
- Common but not particularly frequent
- Not frequently

**11. How frequently do your fluctuating patients get accused of malingering (“faking it”) to get attention when “off”?**

- Frequently
- Not frequently

**12. How often do your patients call to discuss concerns about the interaction of their disease and anesthesia (e.g., for a colonoscopy) or a planned surgical event (e.g., knee surgery)?**

- Frequently
- Common but not particularly frequent
- Not frequently

**13. How often do patients report having an increased observance of thinking difficulty after a hospital admission?**

- Frequently
- Common but not particularly frequent
- Not frequently

**14. How often do patients reported increased mood difficulties after a hospital admission?**

- Frequently
- Common but not particularly frequent
- Not frequently

**15. How often do patients report increased motor difficulty after a hospital admission?**

- Frequently
- Common but not particularly frequent
- Not frequently

## NPF Hospitalization Survey

**16. How often do you and your staff ask patients about recent hospitalizations and changes in thinking, mood, or motor functions?**

- Frequently
- Common but not particularly frequent
- Not frequently

**17. Are palliative care consultations available in your hospital?**

- Yes
- No

**18. If yes to question 17, have you referred patients with advanced PD for palliative care consultation?**

- Yes
- No

**19. How many times have you referred a PD patient for hospice evaluation?**

- Never
- Once
- More than once

**20. In your institution (or hospital), do you have any requirements (formal instructions) that prior to operating on a PD patient, a movement disorder consult must be sought?**

- Yes
- No

**21. In your institute, are PD patients seen by a movement disorder specialist within a week post-operatively of the procedure and also prior to discharge?**

- Rarely
- Some times
- Most of the times
- Always, as a policy

## NPF Hospitalization Survey

22. Have you found any other strategies (not described above) effective in reducing morbidity or mortality during hospitalization or the length of stay?

# NPF Hospitalization Survey

## 6. Deep Brain Stimulation

**1. Does your center perform DBS surgery?**

Yes

No

**\* 2. Can your center admit patients for management of DBS related programming issues?**

Yes

No

If yes, what is the usual number of days for each admission?

  

**3. If DBS patients are implanted at other centers (not by your team and surgeon) are they allowed to come to your center for care?**

Yes

No

**4. Is a member of your DBS team available to go to the hospital and check a hospitalized patient's device, if hospitalized in your hospital system?**

Yes

No

**5. Is a member of your DBS team available to provide guidance to outside physicians/hospitals on handling the DBS device (programming, turning on/off, getting imaging studies, taking a patient to the OR, etc.)?**

Yes

No

# NPF Hospitalization Survey

**6. Please rank the following reasons PD DBS patients might be admitted to your hospital indicating whether, compared with the other choices presented, each option is more or less frequent.**

|                                                              | More frequent         | Middle                | Less frequent         |
|--------------------------------------------------------------|-----------------------|-----------------------|-----------------------|
| Aspiration pneumonia                                         | <input type="radio"/> | <input type="radio"/> | <input type="radio"/> |
| Infection of DBS device                                      | <input type="radio"/> | <input type="radio"/> | <input type="radio"/> |
| Other infections besides pneumonia or DBS device             | <input type="radio"/> | <input type="radio"/> | <input type="radio"/> |
| Medication issues                                            | <input type="radio"/> | <input type="radio"/> | <input type="radio"/> |
| Confusion/mental status change                               | <input type="radio"/> | <input type="radio"/> | <input type="radio"/> |
| DBS hardware complication (fracture, etc. but not infection) | <input type="radio"/> | <input type="radio"/> | <input type="radio"/> |
| Headache                                                     | <input type="radio"/> | <input type="radio"/> | <input type="radio"/> |
| Fall/orthopedic/fracture                                     | <input type="radio"/> | <input type="radio"/> | <input type="radio"/> |
| Sudden DBS failure with rebound symptoms                     | <input type="radio"/> | <input type="radio"/> | <input type="radio"/> |
| Other                                                        | <input type="radio"/> | <input type="radio"/> | <input type="radio"/> |

Other (please specify)

**7. Are PD DBS patients more likely to undergo?**

- Medication change during hospitalization
- DBS programming change during hospitalization
- Both a medication change and a DBS programming

# NPF Hospitalization Survey

## 7. International Differences in Care

In your country does your health care system encourage/allow you to:

### 1. Admit patients electively for medication management?

(Y/N)

Yes

No

If yes, what is the usual number of days for each admission?

  
  

### 2. Admit patients electively for behavioral management?

Yes

No

If yes, what is the usual number of days for each admission?

  
  

### 3. Admit patients for rehabilitation program(s)?

Yes

No

### 4. Send patient over for in-patient, rehabilitation program after hospitalization for acute care

Yes

No

### 5. Have prolonged admissions for initial DBS programming during the first 6 months of care?

Yes

No

### 6. Is there an incentive to provide excellent and readily available outpatient care to try to avoid admissions?

Yes

No
